# Supplementary material
Source: PubMed Central journal article supplement (PMC1564258)
Supplement: pnas_0603767103_2.pdf [file pnas_0603767103_2.pdf]

## Figure 4

Examples of temporal expression patterns of pole cell-enriched genes. Type I, genes whose transcripts are initially detected in the pole cells during their migration through the posterior midgut epithelium (stage 9-11) and remain detectable after the coalescence of gonads. Type II, genes whose transcripts are detected in various tissues before gonad formation but are enriched in pole cells after they associate with the gonadal somatic cells. Type III, genes whose transcripts are detected throughout embryogenesis. Embryos stained by in situ hybridization are shown with anterior to the left. Pole cells are indicated by arrowheads. In panel Q, arrowhead accompanied with "L" indicates the lost pole cells, which failed to be incorporated within the gonads. Expression patterns of CG4415 (A-D), CG9871 (E-H, Q), *grp* (I-L) and Hsp27 (M-P) are shown.
