# Supplementary material
Source: PubMed Central journal article supplement (PMC1564258)

CG4415 (Type I)

CG9871 (Type I)

*grp* (Type II)*Hsp27* (Type III)

Stage 2

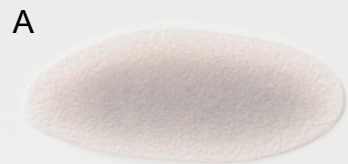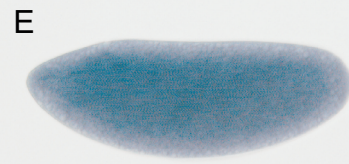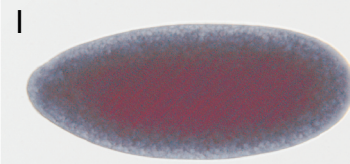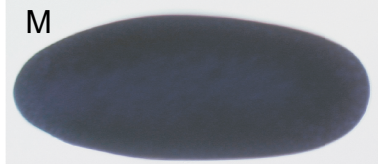

Stage 5

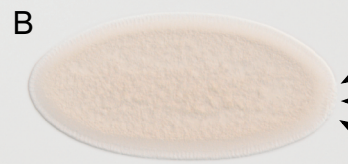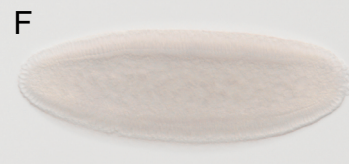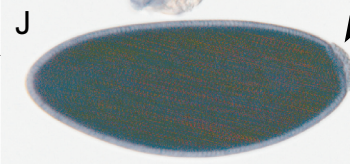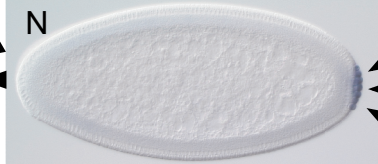

Stage 10,11

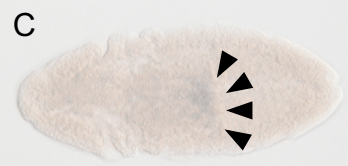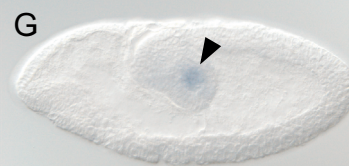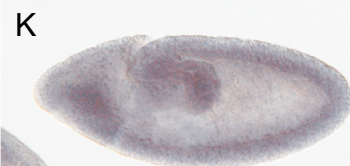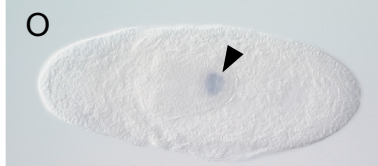

Stage 15,16

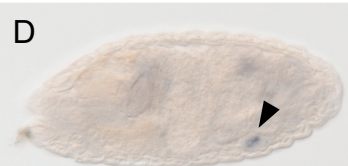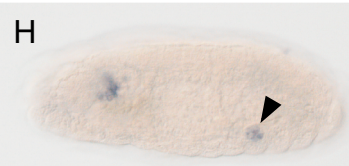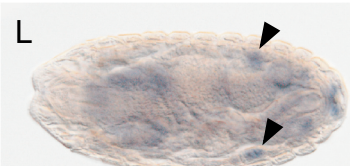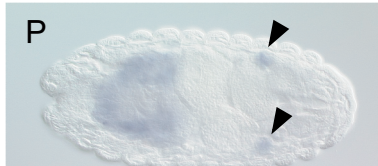lost pole cells  
stage 14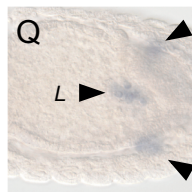

Supplement: pnas_0603767103_1.pdf [file pnas_0603767103_1.pdf]
